# Supplementary material for: The interplay of fibronectin functionalization and TGF-β1 presence on fibroblast proliferation, differentiation and migration in 3D matrices
Source: Royal Society of Chemistry journal article supplement (doi:10.1039/c5bm00140d), 2015-01-01
Supplement: c5bm00140d1.pdf [file c5bm00140d1.pdf]

## Supplemental Information

### **The interplay of fibronectin functionalization and TGF- $\beta$ 1 presence on fibroblast proliferation, differentiation and migration in 3D matrices**

Jiranuwat Sapudom,<sup>a</sup> Stefan Rubner,<sup>a</sup> Steve Martin,<sup>a</sup> Stephan Thoenes,<sup>b</sup>  
Ulf Anderegg,<sup>b</sup> Tilo Pompe<sup>a,\*</sup>

<sup>a</sup> Biophysical Chemistry Group, Institute of Biochemistry, Faculty of Biosciences, Pharmacy and Psychology, Universität Leipzig, Leipzig 04103, Germany.

<sup>b</sup> Department of Dermatology, Venerology and Allergology, Universitätsklinikum Leipzig, Leipzig 04103, Germany

\* To whom correspondence should be addressed

Tilo Pompe

Postal address:           Universität Leipzig  
                                  Institute of Biochemistry  
                                  Johannisallee 21-23  
                                  04103 Leipzig  
                                  Germany

Telephone/Fax: +49 341 97 36931/9

Email:                     [tilo.pompe@uni-leipzig.de](mailto:tilo.pompe@uni-leipzig.de)

**Tab. S1** qRT-PCR primer sequences used in the experiments.

| Primer                                  | Sequence (5' → 3')          | Accession number |
|-----------------------------------------|-----------------------------|------------------|
| <b>RPS26</b>                            |                             | NM_001029        |
| Fwd.                                    | CAA TGG TCG TGC CAA AAA G   |                  |
| Rev.                                    | TTC ACA TAC AGC TTG GGA AGC |                  |
| <b><math>\alpha</math>SMA</b>           |                             | NM_001141945.1   |
| Fwd.                                    | AGA CCC TGT TCC AGC CAT C   |                  |
| Rev.                                    | TGC TAG GGC CGT GAT CTC     |                  |
| <b>collagen I(<math>\alpha</math>1)</b> |                             | NM_002421.3      |
| Fwd.                                    | GTC GCA CTG GTG ATG CTG     |                  |
| Rev.                                    | GGT GGT GTC CAC CTC GAG     |                  |
| <b>EDA-FN</b>                           |                             | NM_002026.2      |
| Fwd.                                    | CCA GTC CAC AGC TAT TCC TG  |                  |
| Rev.                                    | ACA ACC ACG GAT GAG CTG     |                  |

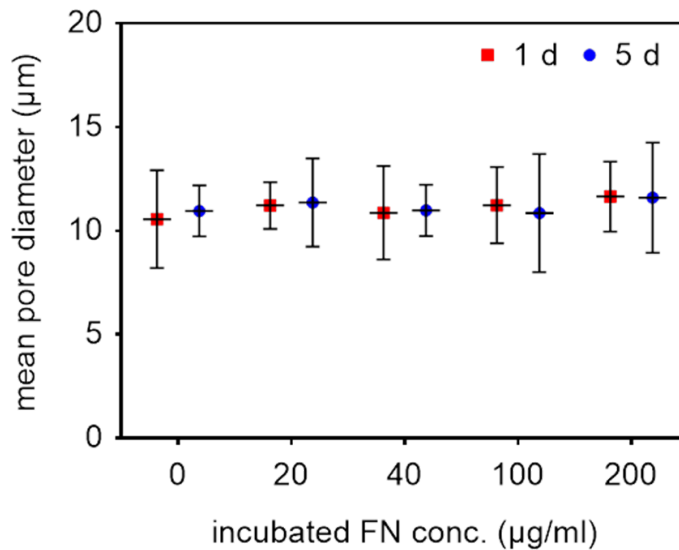

**Fig. S1. Pore diameter analysis of 3D Coll I matrices with adsorptive FN immobilization.** Mean pore diameter of adsorptive immobilized FN was analysed from cLSM images using the home-built image analysis tool<sup>1</sup>. Mean pore diameters are shown in dependence on incubated FN amount after 1 d and 5 d of incubation in cell culture medium. Analysis of pore size was performed at least in triplicates with 6 positions per sample (n=3; mean±SD).

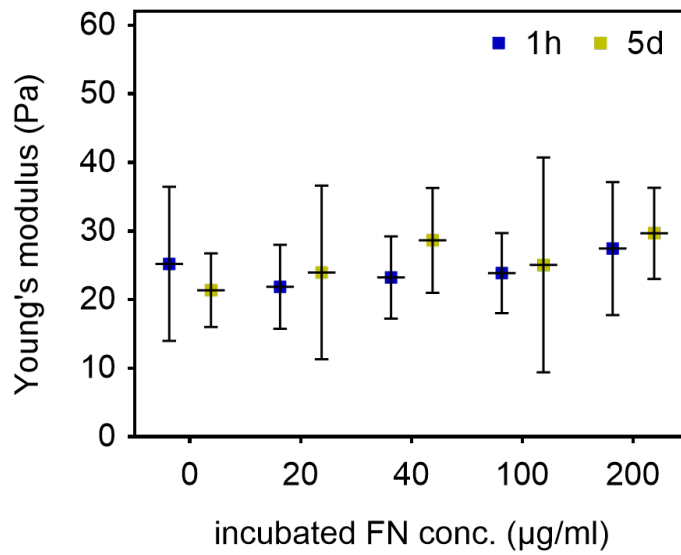

**Fig. S2. Mechanical analysis of 3D Coll I matrices with adsorptive FN immobilization.** Elasticity of Coll I matrices was analysed using colloidal probe technique<sup>2</sup> after 1 d and 5 d of incubation in DMEM cell culture medium with 10% FCS supplement. For the measurement of Young's modulus, at least 50 force-distance curves were measured at 3 positions in each Coll I matrix. (n=3; mean±SD).

## References

- 1 K. Franke, J. Sapudom, L. Kalbitzer, U. Anderegg and T. Pompe, *Acta Biomater.*, 2014, **10**, 2693–2702.
- 2 J. Sapudom, S. Rubner, S. Martin, T. Kurth, S. Riedel, C. T. Mierke and T. Pompe, *Biomaterials*, 2015, **52**, 367–375.
